# Supplementary material for: A used battery supported Ag catalyst for efficient oxidation of alcohols and carbon oxide
Source: Royal Society of Chemistry journal article supplement (doi:10.1039/c4ra01786b), 2014-01-01
Supplement: c4ra01786b1.pdf [file c4ra01786b1.pdf]

# Supporting Information

## Disposed Battery Supported Ag Catalyst for Efficient Oxidation of Alcohols and Carbon Oxide

Junjie Mao, Guofeng Zhao, Dingsheng Wang\*, and Yadong Li

Department of Chemistry, Tsinghua University, Beijing, 100084, China

\*E-mail: wangdingsheng@tsinghua.edu.cn

### Experimental

#### Pre-treatment of disposed battery

To obtain pure MnO<sub>2</sub>, manganese dioxide powder mixture (20 g) from disposed battery was treated in hydrochloric acid (15-30 ml) by stirring at 70-80 °C for 4 h. The precipitation was filtered and the filtrate was then oxidized by NaClO solution (12%, 120-200 ml) at 45 °C for 6 h. The insoluble MnO<sub>2</sub> was separated and washed by dilute hydrochloric acid, dried in air at 100 °C overnight.

#### Preparation of Ag/MnO<sub>2</sub> and Ag/Mn<sub>3</sub>O<sub>4</sub> catalysts

Silver was deposited on the as-obtained MnO<sub>2</sub> by in-situ reduction using NaBH<sub>4</sub> as reducing agent. In a typical synthesis of Ag-9/MnO<sub>2</sub>, PVP (MW = 30 000, 100 mg) and 0.14 g of dried MnO<sub>2</sub> were dispersed homogeneously in 20 ml of deionized water under vigorous stirring at room temperature. AgNO<sub>3</sub> aqueous solution (4.4 mg/ml, 5 ml) was added dropwise into the suspension. Then 80 mg NaBH<sub>4</sub> was added to the mixture slowly, with stirring for 2 h under room temperature. The products were collected by filtration, washed with ethanol to remove any possible organic remnants, and were then heated at 373 K overnight. The as-fabricated catalyst is designated as Ag-9/MnO<sub>2</sub> (9 stands for the silver loading in weight percentage). The catalysts with different Ag loading were prepared by the same procedure just tuning the amount of AgNO<sub>3</sub> in the corresponding suspension. Before gas-phase alcohols oxidation test, Ag/MnO<sub>2</sub> catalysts was pre-activation, using WHSV = 20 h<sup>-1</sup> and O<sub>2</sub>/ol = 0.6 at 280 °C in advance, and then Ag/MnO<sub>2</sub> was transformed into Ag/Mn<sub>3</sub>O<sub>4</sub>.

#### Characterizations

The catalysts were characterized by using X-ray diffraction (XRD, Rigaku Ultima IV diffractometer (Cu K radiation = 1.5406 Å), transmission electron microscopy (TEM, JEOL-JEM-2010 instrument at 200 kV) and high-resolution transmission electron microscope (HRTEM, JEOL-2010F instrument at 200 kV). Specific surface area was determined from N<sub>2</sub> adsorption isotherm at -196 °C using standard Brunauer-Emmett-Teller (BET) theory. Before the measurement, degassing was conducted at 200 °C for 2 h to remove possible moisture. X-ray photoelectron spectroscopy (XPS) were recorded on a VG EscaLab 220i spectrometer, using a standard Al Kα X-ray source (300 W) and an analyzer pass energy of 20 eV. All binding energies are referenced to the adventitious C1s line at 284.9 eV.

#### Reactivity tests

The gas-phase selective oxidation of alcohols on these catalysts with molecular oxygen was performed on a fixed-bed quartz tube reactor (700 mm length by 6 mm inner diameter) under atmospheric pressure as described previously.<sup>1</sup> Cyclohexanol was continuously fed using a high-performance liquid pump in parallel with O<sub>2</sub> (oxidant) and N<sub>2</sub> (diluted gas of 50 ml/min) feeding using calibrated mass flow controllers into the reactor heated to the desired reaction temperature. WHSV was calculated by dividing the mass flow rate of alcohol feedstock by the catalyst mass. The effluent was cooled using an ice-salt bath (-15 °C) to liquefy the condensable vapors for analysis using an Shimadzu-2014 GC gas chromatography-flame ionization detector (GC-FID) with a 60 m HP-5ms capillary column. The catalytic activity tests for CO oxidation were carried out in a continuous-flow fixed bed quartz tubular reactor at ambient pressure. The reactor was charged with 100 mg of the prepared catalyst. The reactant gases (1.0% CO, 16% O<sub>2</sub>, balanced with nitrogen) passed through the reactor at a flow rate of 100 mL min<sup>-1</sup>. The reactor effluent was analyzed by the gas chromatograph equipped with a TDX column.

1 G. F. Zhao, H. Y. Hu, M. M. Deng, M. Ling and Y. Lu, *ChemCatChem*, 2011, **3**, 1629.

### Supplementary Figures

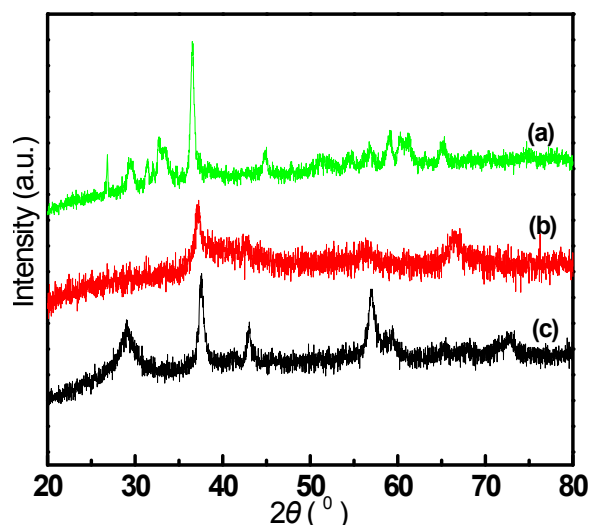

**Fig. S1** The XRD patterns of the (a)  $\text{MnO}_x$ , (b) before calcination  $\text{MnO}_2$ , (c) after calcination  $\text{MnO}_2$  at  $400^{\circ}\text{C}$ .

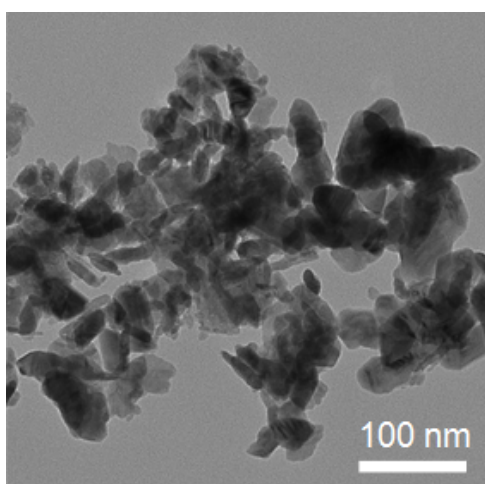

**Fig. S2** TEM images of pure  $\text{MnO}_2$

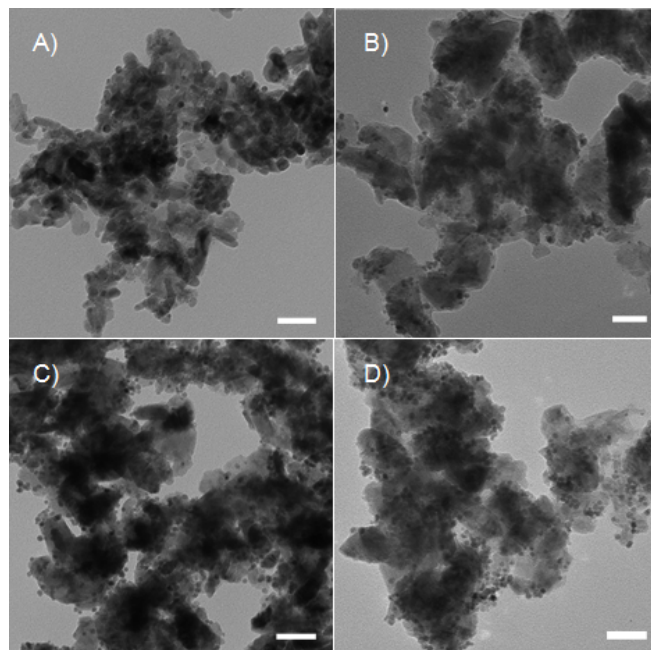

**Fig. S3** TEM images of (A) Ag-3/MnO<sub>2</sub>, (B) Ag-5/MnO<sub>2</sub>, (C) Ag-7/MnO<sub>2</sub>, and (D) Ag-11/MnO<sub>2</sub>, scar bar 50 nm.

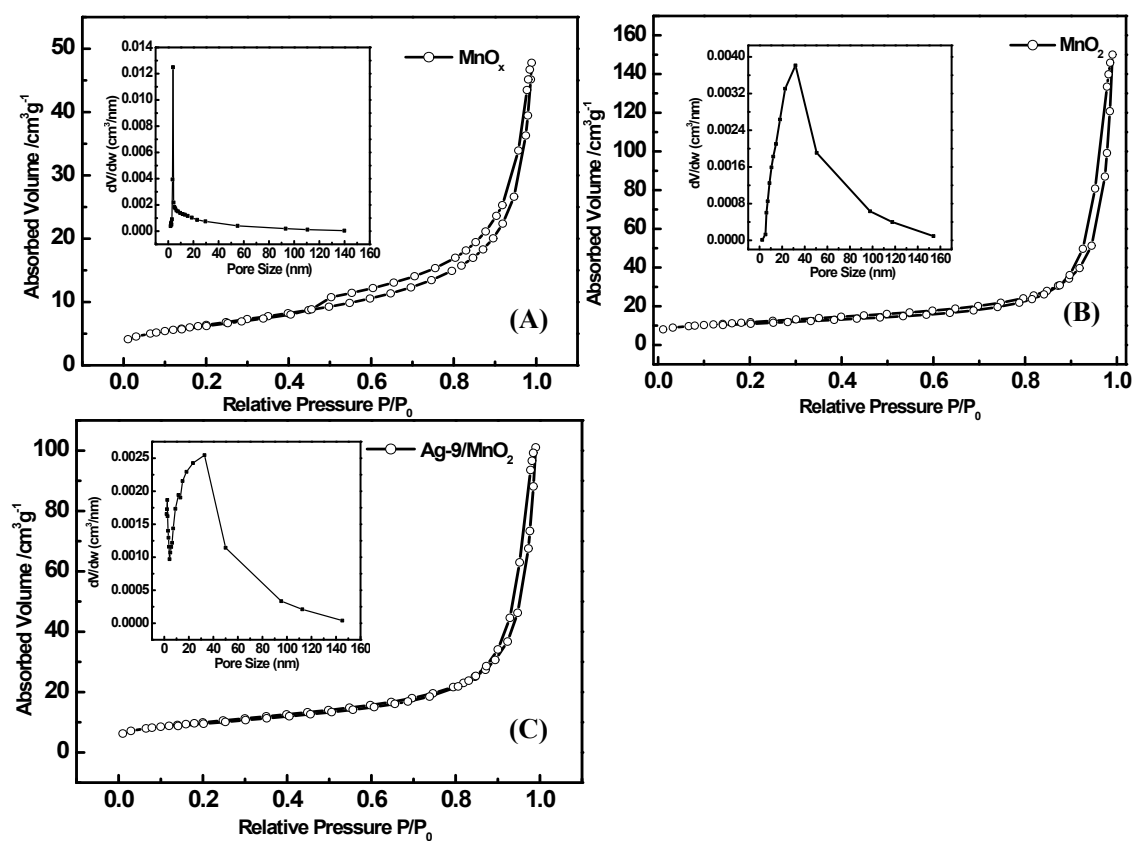

**Fig. S4** N<sub>2</sub> adsorption - desorption isotherms and pore size distribution curves of (A) MnO<sub>x</sub>, (B) MnO<sub>2</sub> and (C) Ag-9/MnO<sub>2</sub> catalysts.

**Table S1.** Oxidation of various alcohols over the pre-activated Ag-9/Mn<sub>3</sub>O<sub>4</sub> catalysts.

| Substrate       | O <sub>2</sub> /ol ratio (mol/mol) | Temperature (°C) | Conversion (%) | Selectivity (%) |
|-----------------|------------------------------------|------------------|----------------|-----------------|
| 1-phenylethanol | 0.8                                | 250              | 95             | 92              |
| 2-phenylethanol | 0.8                                | 280              | 23             | 70              |
| 1-octanol       | 0.6                                | 270              | 40             | 87              |
| 2-octanol       | 0.6                                | 250              | 34             | 75              |
| benzylalcohol   | 0.6                                | 230              | 92             | 98              |
| 1,2-propanediol | 1.6                                | 270              | 54             | 74              |

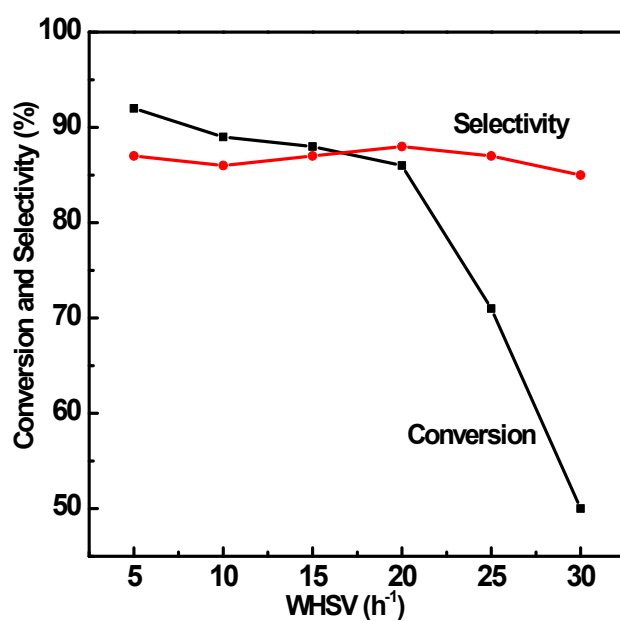

**Fig. S5** WHSV with O<sub>2</sub>/ol = 0.6 on the pre-activated Ag-9/Mn<sub>3</sub>O<sub>4</sub> catalyst for the gas-phase oxidation of cyclohexanol at 280 °C.
